# Supplementary material
Source: bioRxiv or medRxiv preprint supplement (https://www.biorxiv.org/highwire/filestream/2610/field_highwire_adjunct_files/2/002287-3.pdf)

**A**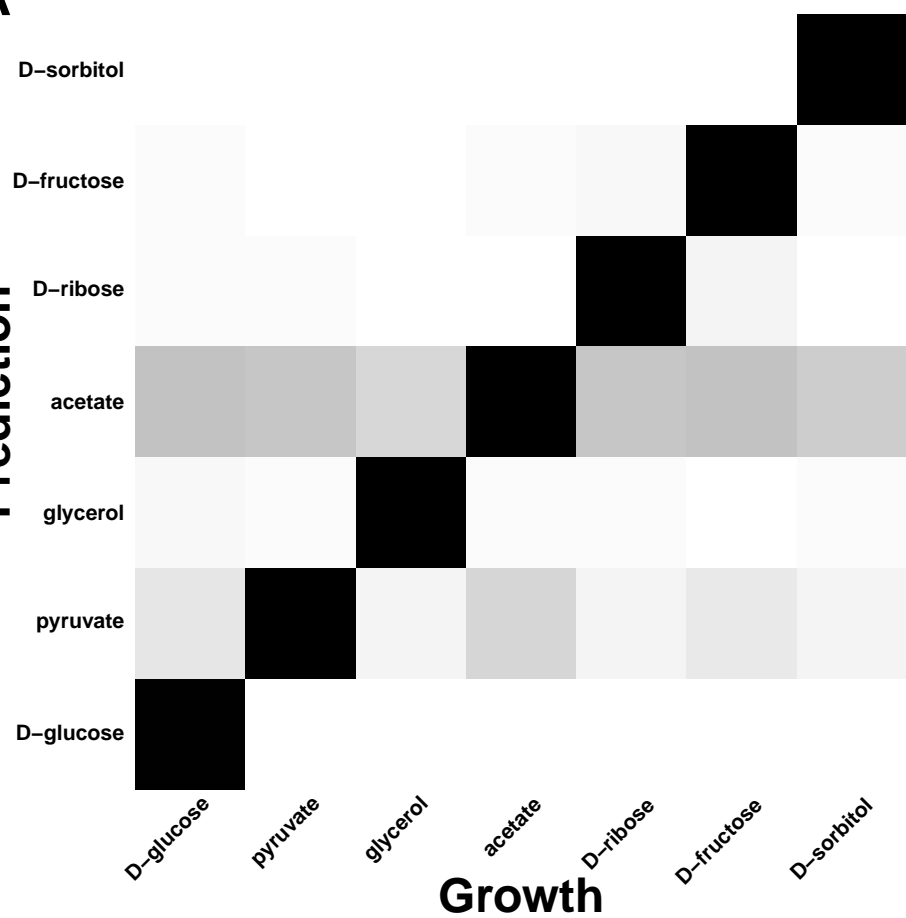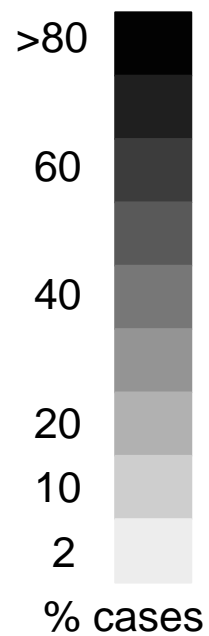**B**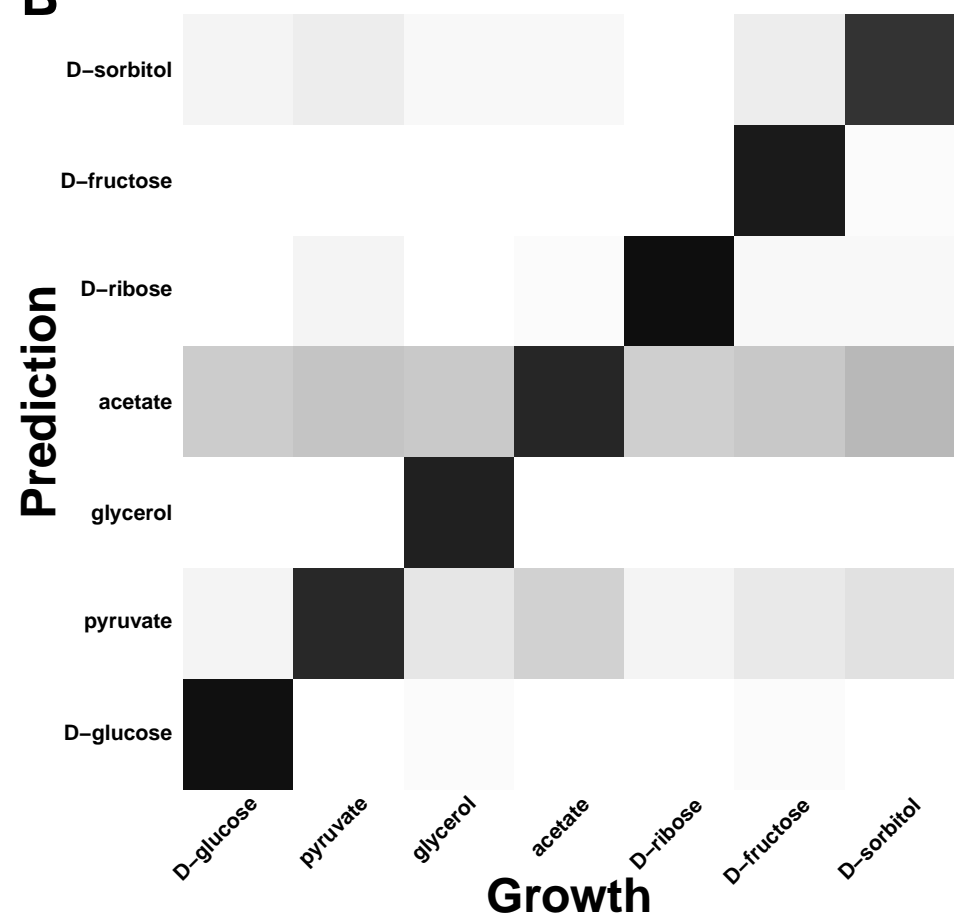**C**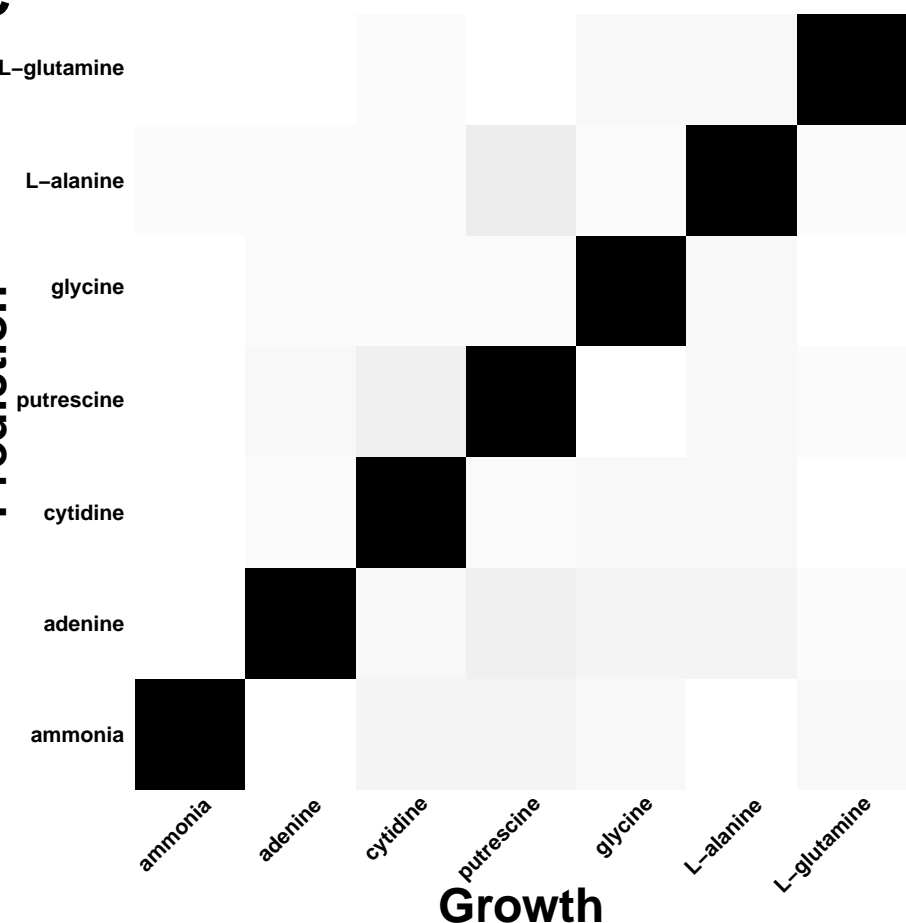**D**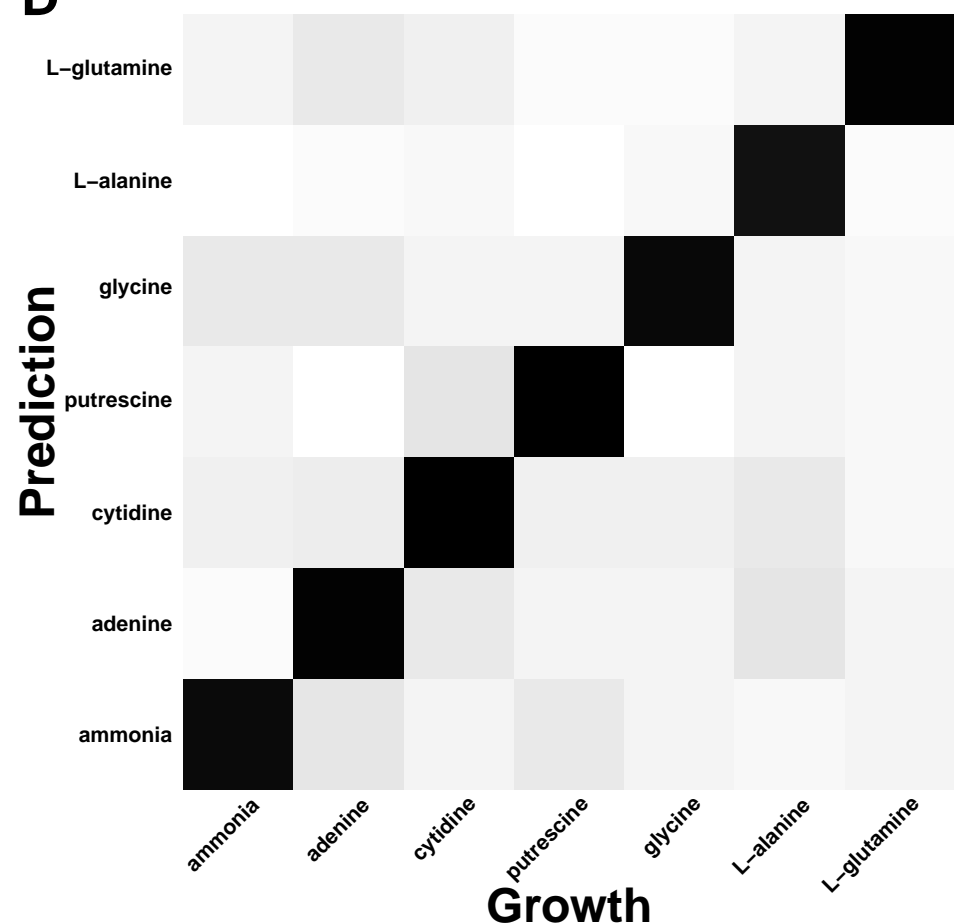

Supplement: Supplementary file [file 002287-3.pdf]
